# Supplementary material for: Dysregulation of the long non-coding RNA transcriptome in a Rett syndrome mouse model
Source: PubMed Central journal article supplement — RNA Biol. 2013 Apr 17;10(7):1197–203. doi: 10.4161/rna.24286 (PMC3849168; doi:10.4161/rna.24286), 2013-04-17
Supplement: rna-10-1197-s01.pdf [file rna-10-1197-s01.pdf]

## **Supplemental Material to:**

**Paolo Petazzi, Juan Sandoval, Karolina Szczesna,  
Olga C. Jorge, Laura Roa, Sergi Sayols, Antonio Gomez,  
Dori Huertas and Manel Esteller**

**Dysregulation of the long non-coding  
RNA transcriptome in a Rett syndrome mouse model**

**2013; 10(7)**

**<http://dx.doi.org/10.4161/rna.24286>**

**[www.landesbioscience.com/journals/rnabiology/article/24286/](http://www.landesbioscience.com/journals/rnabiology/article/24286/)**

## Supplementary table 1

### Upregulated lncRNAs

| <i>Accession</i> | <i>p-value</i> | <i>FC</i> | <i>strand</i> | <i>Map</i>                   | <i>length</i> | <i>source</i>    |
|------------------|----------------|-----------|---------------|------------------------------|---------------|------------------|
| AK148638         | 0,0279         | 7,13      | -             | chr5: 67485667.. 67486864    | 1199          | Fantom           |
| AK139012         | 0,0497         | 4,91      | -             | chr17: 56240015.. 56241405   | 1392          | Fantom           |
| uc008ynf         | 0,0232         | 4,89      | -             | chr5: 108249450.. 108298127  | 733           | UCSC_kg          |
| AK081227         | 0,0075         | 4,08      | +             | chr4: 33179640.. 33180890    | 1250          | Fantom           |
| AK172011         | 0,0494         | 3,85      | +             | chr8: 109817588.. 109853207  | 4935          | Fantom           |
| uc007dxm         | 0,0018         | 3,67      | +             | chr1: 183743588.. 183745905  | 1999          | UCSC_kg          |
| AK084846         | 0,0133         | 3,67      | -             | chr3: 119441639.. 119445686  | 4052          | Fantom           |
| AK014053         | 0,0141         | 3,28      | +             | chr8: 59992902.. 59993284    | 383           | Fantom           |
| AK087060         | 0,0085         | 3,27      | +             | chr3: 62142923.. 62183108    | 2309          | RNAdb            |
| AK087668         | 0,0051         | 3,23      | +             | chr7: 75374178.. 75377336    | 3156          | Fantom           |
| AK081094         | 0,0023         | 3,21      | +             | chr6: 54446552.. 54448516    | 1965          | RNAdb            |
| AK005500         | 0,0321         | 2,93      | -             | chr3: 27316365.. 27318160    | 1794          | Fantom           |
| AK082483         | 0,0375         | 2,93      | +             | chr10: 85763298.. 85769526   | 3369          | RNAdb            |
| AK082710         | 0,0296         | 2,92      | -             | chr5: 122306374.. 122308307  | 1937          | Fantom           |
| AK162139         | 0,0155         | 2,91      | +             | chr12: 85934321.. 85936391   | 2071          | Fantom           |
| AK032862         | 0,0296         | 2,89      | -             | chr9: 116486423.. 116487711  | 1290          | Fantom           |
| AK158336         | 0,0372         | 2,89      | +             | chr1: 82738552.. 82742470    | 3921          | Fantom           |
| AK031401         | 0,0065         | 2,87      | -             | chr4: 108235776.. 108239632  | 2221          | Fantom           |
| AK045737         | 0,0005         | 2,79      | +             | chr5: 65998325.. 66001704    | 3378          | NRED             |
| AK032216         | 0,0367         | 2,67      | +             | chr6: 83929903.. 83930986    | 1083          | Fantom           |
| AK054306         | 0,0141         | 2,67      | -             | chr2: 163462259.. 163463893  | 1635          | Fantom           |
| AK043342         | 0,0333         | 2,63      | +             | chrX: 155897079.. 155927303  | 1225          | RNAdb            |
| AK048686         | 0,0303         | 2,62      | +             | chr2: 173604428.. 173608268  | 3837          | Fantom           |
| AK033074         | 0,0260         | 2,61      | -             | chr6: 126587814.. 126590122  | 2305          | Fantom           |
| AK034153         | 0,0196         | 2,54      | -             | chr8: 29758364.. 29759767    | 1404          | Fantom           |
| uc008gmk         | 0,0326         | 2,51      | +             | chr19: 8797976.. 8800931     | 2348          | UCSC_kg          |
| AK009157         | 0,0067         | 2,46      | -             | chr16: 31249336.. 31249832   | 498           | NRED             |
| AK138892         | 0,0343         | 2,46      | -             | chr4: 109880570.. 109882113  | 1545          | Fantom           |
| AK076300         | 0,0056         | 2,45      | +             | chr12: 76438603.. 76442894   | 4301          | Fantom           |
| AK155976         | 0,0340         | 2,38      | -             | chr2: 156004562.. 156005922  | 1361          | NRED             |
| AK045546         | 0,0054         | 2,36      | -             | chr16: 31297849.. 31298997   | 1148          | Fantom           |
| uc.455-          | 0,0268         | 2,34      | -             | chr2: 156004547..156004792   | 245           | UCR              |
| AK003352         | 0,0114         | 2,31      | +             | chr11: 83560498.. 83566142   | 378           | Fantom_stringent |
| AK084585         | 0,0277         | 2,30      | +             | chr5: 33761040.. 33762400    | 1361          | Fantom_stringent |
| AK041202         | 0,0203         | 2,28      | -             | chr4: 4690656.. 4694549      | 3894          | Fantom           |
| uc008fdk         | 0,0073         | 2,28      | -             | chr18: 62911327.. 62916001   | 2133          | UCSC_kg          |
| uc007qxl         | 0,0059         | 2,22      | +             | chr13: 63341350.. 63427404   | 2856          | UCSC_kg          |
| AK155243         | 0,0265         | 2,20      | +             | chr14: 28162476.. 28165153   | 2671          | Fantom_stringent |
| AK053095         | 0,0199         | 2,20      | -             | chr12: 104641094.. 104645015 | 3922          | Fantom           |
| AK139325         | 0,0355         | 2,18      | +             | chr11: 121121312.. 121123818 | 706           | RNAdb            |
| AK032566         | 0,0344         | 2,18      | +             | chr12: 110887814.. 110890438 | 2626          | NRED             |
| uc007sue         | 0,0339         | 2,17      | +             | chr14: 28686317.. 28693509   | 1098          | UCSC_kg          |
| AK078616         | 0,0177         | 2,15      | +             | chr8: 95522510.. 95525565    | 3056          | Fantom           |
| uc008hgh         | 0,0072         | 2,15      | +             | chr19: 34365155.. 34383840   | 548           | UCSC_kg          |
| AK021378         | 0,0085         | 2,14      | -             | chr11: 101891581.. 101896398 | 452           | NRED             |

|          |        |      |   |                              |      |                  |
|----------|--------|------|---|------------------------------|------|------------------|
| AK043533 | 0,0084 | 2,14 | - | chr8: 126291450.. 126292395  | 946  | Fantom           |
| AK043808 | 0,0172 | 2,12 | - | chr19: 56883324.. 56884168   | 844  | Fantom           |
| AK140080 | 0,0478 | 2,11 | - | chr11: 55318490.. 55320723   | 2235 | Fantom           |
| AK037682 | 0,0167 | 2,11 | - | chr9: 71953945.. 71956491    | 2547 | Fantom           |
| AK085684 | 0,0484 | 2,08 | - | chr9: 48626634.. 48630230    | 3597 | Fantom           |
| AK078380 | 0,0464 | 2,07 | + | chr17: 36131397.. 36175351   | 1081 | NRED             |
| uc008ker | 0,0220 | 2,07 | - | chr2: 75529108.. 75542698    | 1599 | UCSC_kg          |
| AK082668 | 0,0341 | 2,05 | + | chr2: 113839219.. 113841580  | 2390 | NRED             |
| uc008pwq | 0,0017 | 2,04 | - | chr3: 88604605.. 88636420    | 900  | UCSC_kg          |
| AK017643 | 0,0330 | 2,03 | - | chr2: 13942604.. 13943023    | 419  | NRED             |
| uc007szy | 0,0425 | 2,03 | + | chr14: 34418119.. 34453940   | 2828 | UCSC_kg          |
| AK045718 | 0,0339 | 2,03 | + | chr8: 85609139.. 85611655    | 2516 | Fantom           |
| AK021389 | 0,0233 | 2,02 | + | chr17: 71596413.. 71597560   | 1147 | Fantom           |
| AK011095 | 0,0005 | 2,01 | - | chr10: 58979547.. 58980426   | 916  | NRED             |
| AK032585 | 0,0116 | 2,01 | - | chr6: 36790805.. 36793986    | 3181 | Fantom           |
| AK158480 | 0,0149 | 2,00 | - | chr9: 121684141.. 121687264  | 3125 | Fantom           |
| AK030738 | 0,0431 | 1,97 | + | chr14: 54980517.. 54981576   | 1060 | Fantom           |
| AK079676 | 0,0383 | 1,95 | - | chr2: 168010845.. 168012018  | 1175 | Fantom           |
| AK049914 | 0,0364 | 1,94 | - | chr16: 31305632.. 31309692   | 4061 | Fantom           |
| AK020518 | 0,0342 | 1,94 | - | chr18: 5141759.. 5334426     | 564  | Fantom           |
| AK162709 | 0,0459 | 1,93 | - | chrX: 100771771.. 100773365  | 1593 | Fantom           |
| AK048727 | 0,0442 | 1,93 | + | chr6: 88688185.. 88691358    | 3174 | Fantom           |
| AK082448 | 0,0407 | 1,93 | + | chr10: 5923171.. 5937498     | 4156 | Fantom           |
| AK053186 | 0,0024 | 1,92 | - | chr7: 63180140.. 63181753    | 1612 | Fantom           |
| AK083730 | 0,0095 | 1,91 | - | chr18: 64671313.. 64676168   | 382  | RNAdb            |
| AK089346 | 0,0433 | 1,91 | - | chr13: 45650490.. 45651700   | 1210 | Fantom           |
| AK082533 | 0,0109 | 1,91 | + | chr15: 39513828.. 39517648   | 3823 | Fantom           |
| AK037919 | 0,0250 | 1,91 | + | chr10: 50313102.. 50314461   | 1365 | Fantom           |
| AK047050 | 0,0258 | 1,89 | + | chr13: 63430866.. 63432792   | 1932 | Fantom           |
| AK033816 | 0,0331 | 1,89 | + | chr6: 148183474.. 148185162  | 1687 | Fantom           |
| AK041401 | 0,0390 | 1,89 | + | chr3: 84656572.. 84658411    | 1839 | Fantom           |
| AK086859 | 0,0126 | 1,88 | - | chr5: 100152483.. 100158075  | 2423 | Fantom_stringent |
| AK050794 | 0,0042 | 1,87 | + | chr9: 85739048.. 85740387    | 1338 | Fantom           |
| AK050972 | 0,0412 | 1,86 | - | chr5: 139601671.. 139602932  | 1272 | Fantom           |
| AK037557 | 0,0343 | 1,85 | + | chr3: 27082625.. 27086450    | 3828 | Fantom           |
| AK037993 | 0,0313 | 1,85 | - | chrX: 71144655.. 71146077    | 1670 | Fantom           |
| AK036286 | 0,0407 | 1,83 | - | chr1: 160415162.. 160484430  | 1192 | Fantom           |
| uc007hsy | 0,0418 | 1,82 | + | chr11: 3352474.. 3379834     | 968  | UCSC_kg          |
| AK141071 | 0,0188 | 1,81 | + | chr4: 58925764.. 58929331    | 3569 | Fantom           |
| AK042182 | 0,0038 | 1,81 | + | chr6: 38548025.. 38552376    | 4349 | NRED             |
| AK082193 | 0,0062 | 1,81 | + | chr9: 83241352.. 83244188    | 2837 | Fantom           |
| AK079854 | 0,0224 | 1,80 | - | chr9: 77390510.. 77392597    | 2089 | RNAdb            |
| uc007ecv | 0,0103 | 1,80 | + | chr1: 193641274.. 193643421  | 1190 | UCSC_kg          |
| AK076444 | 0,0149 | 1,79 | - | chr15: 100376496.. 100382205 | 2720 | RNAdb            |
| AK138382 | 0,0150 | 1,79 | - | chr3: 121958875.. 121996467  | 1803 | RNAdb            |
| AK035579 | 0,0398 | 1,78 | + | chr17: 84140203.. 84143189   | 2984 | Fantom           |
| AK016849 | 0,0041 | 1,78 | - | chr1: 134858229.. 134869291  | 2029 | Fantom           |
| AK156293 | 0,0273 | 1,77 | - | chr15: 41030866.. 41032417   | 1551 | Fantom           |
| AK145473 | 0,0085 | 1,75 | - | chr10: 29056684.. 29059048   | 2364 | Fantom           |
| AK137572 | 0,0429 | 1,74 | + | chr19: 46855123.. 46856494   | 1780 | Fantom           |

|          |        |      |   |                              |      |                  |
|----------|--------|------|---|------------------------------|------|------------------|
| AK041418 | 0,0302 | 1,74 | - | chr18: 31365719.. 31476765   | 1675 | RNAdb            |
| AK135064 | 0,0130 | 1,74 | + | chr5: 108066047.. 108068380  | 2333 | Fantom           |
| AK080457 | 0,0382 | 1,74 | + | chr5: 148211129.. 148213493  | 1478 | Fantom           |
| AK036126 | 0,0021 | 1,73 | + | chr3: 32314596.. 32318013    | 3417 | Fantom           |
| uc009uco | 0,0061 | 1,73 | + | chrX: 106029816.. 106082235  | 1005 | UCSC_kg          |
| AK028949 | 0,0060 | 1,73 | - | chr12: 32614277.. 32635085   | 2704 | RNAdb            |
| AK009643 | 0,0165 | 1,72 | + | chr19: 53978478.. 53979448   | 978  | NRED             |
| AK008130 | 0,0047 | 1,72 | + | chr16: 32877898.. 32897336   | 621  | RNAdb            |
| AK140184 | 0,0305 | 1,72 | - | chr12: 109151850.. 109153595 | 1744 | Fantom           |
| uc009usf | 0,0158 | 1,71 | - | chrX: 154223090.. 154235951  | 2760 | UCSC_kg          |
| AK015450 | 0,0447 | 1,70 | + | chr13: 46031408.. 46032273   | 768  | NRED             |
| AK032397 | 0,0023 | 1,70 | - | chr10: 7669745.. 7674367     | 4621 | Fantom           |
| uc008zjd | 0,0310 | 1,69 | - | chr5: 121878598.. 121902483  | 4021 | UCSC_kg          |
| AK141699 | 0,0357 | 1,69 | + | chr4: 12909302.. 12910391    | 1089 | Fantom           |
| AK048739 | 0,0404 | 1,69 | - | chr5: 99726262.. 100158064   | 3342 | RNAdb            |
| AK085052 | 0,0330 | 1,69 | - | chr6: 106738852.. 106740034  | 1182 | Fantom           |
| AK014721 | 0,0258 | 1,68 | - | chr4: 19830074.. 19831077    | 1004 | NRED             |
| uc009qxb | 0,0005 | 1,68 | + | chr9: 85739476.. 85740387    | 911  | UCSC_kg          |
| AK142408 | 0,0305 | 1,65 | - | chr8: 105178514.. 105182088  | 3578 | Fantom           |
| AK039343 | 0,0065 | 1,65 | + | chr11: 80209732.. 80210994   | 1262 | Fantom           |
| AK078011 | 0,0326 | 1,65 | - | chr14: 49602163.. 49610865   | 742  | Fantom           |
| AK141173 | 0,0166 | 1,65 | + | chr9: 109029988.. 109031902  | 1915 | RNAdb            |
| AK142429 | 0,0368 | 1,65 | + | chr5: 135152359.. 135156015  | 1149 | Fantom           |
| AK172478 | 0,0090 | 1,65 | - | chr9: 56264505.. 56265857    | 1356 | Fantom           |
| AK142884 | 0,0133 | 1,64 | + | chr4: 53484479.. 53485068    | 589  | Fantom           |
| AK141061 | 0,0104 | 1,64 | - | chr13: 15553648.. 15555569   | 1925 | Fantom           |
| AK077505 | 0,0158 | 1,64 | + | chr11: 69048948.. 69050787   | 1842 | NRED             |
| uc008dkn | 0,0094 | 1,64 | + | chr17: 69123159.. 69129426   | 2790 | UCSC_kg          |
| uc007zsg | 0,0307 | 1,64 | + | chr16: 77329449.. 77595507   | 1373 | UCSC_kg          |
| AK046048 | 0,0420 | 1,63 | + | chr2: 14795617.. 14885294    | 3459 | Fantom           |
| uc008zai | 0,0464 | 1,63 | - | chr5: 115262806.. 115263937  | 557  | UCSC_kg          |
| uc009pzc | 0,0070 | 1,63 | - | chr9: 60416665.. 60535718    | 3997 | UCSC_kg          |
| AK142786 | 0,0482 | 1,62 | - | chr12: 8928117.. 8929092     | 977  | Fantom           |
| AK018028 | 0,0363 | 1,62 | + | chr7: 66532304.. 66533800    | 1496 | Fantom_stringent |
| AK038545 | 0,0232 | 1,62 | - | chrX: 158344238.. 158347114  | 2875 | NRED             |
| AK142482 | 0,0490 | 1,62 | + | chr8: 47672615.. 47675910    | 2661 | Fantom           |
| AK031761 | 0,0450 | 1,62 | + | chr9: 106057282.. 106062082  | 4326 | Fantom           |
| uc007eed | 0,0191 | 1,61 | + | chr1: 195033918.. 195080668  | 283  | UCSC_kg          |
| AK033351 | 0,0010 | 1,60 | - | chr13: 32792702.. 32794504   | 1803 | Fantom           |
| AK042463 | 0,0094 | 1,60 | + | chr7: 151607556.. 151608580  | 1026 | Fantom           |
| AK037317 | 0,0457 | 1,60 | + | chr5: 22984852.. 22986701    | 1849 | NRED             |
| uc008qqv | 0,0056 | 1,60 | - | chr3: 100367568.. 100370046  | 2478 | UCSC_kg          |
| AK047253 | 0,0165 | 1,60 | + | chr11: 29642318.. 29644310   | 1993 | Fantom_stringent |
| AK163398 | 0,0421 | 1,60 | + | chr12: 4850134.. 4856149     | 604  | Fantom_stringent |
| AK038405 | 0,0013 | 1,60 | - | chr16: 67295016.. 67295530   | 514  | Fantom           |
| AK172592 | 0,0419 | 1,59 | - | chr17: 50931859.. 50935876   | 4021 | Fantom           |
| AK046934 | 0,0256 | 1,59 | + | chr13: 30095354.. 30098227   | 2874 | Fantom           |
| AK031160 | 0,0327 | 1,58 | - | chr18: 21346253.. 21348551   | 2297 | Fantom           |
| AK086411 | 0,0388 | 1,58 | - | chr2: 104840483.. 104841258  | 777  | Fantom           |
| AK153616 | 0,0333 | 1,58 | - | chr4: 94231831.. 94233336    | 1506 | Fantom           |

|          |        |      |   |                             |      |         |
|----------|--------|------|---|-----------------------------|------|---------|
| AK135255 | 0,0268 | 1,58 | - | chr11: 11859614.. 11863548  | 3933 | NRED    |
| AK030610 | 0,0019 | 1,57 | - | chr16: 28891482.. 28894113  | 2632 | NRED    |
| AK031914 | 0,0345 | 1,57 | - | chr15: 72920095.. 72921088  | 994  | NRED    |
| AK086212 | 0,0182 | 1,57 | - | chr10: 53328639.. 53330676  | 2038 | Fantom  |
| AK045533 | 0,0359 | 1,57 | + | chrX: 17851640.. 17855386   | 1536 | NRED    |
| uc008rpi | 0,0253 | 1,57 | + | chr3: 142906018.. 142922848 | 3540 | UCSC_kg |
| uc007ees | 0,0388 | 1,57 | + | chr1: 196844774.. 196853622 | 4526 | UCSC_kg |
| AK036237 | 0,0459 | 1,57 | + | chr12: 4106957.. 4109204    | 2247 | Fantom  |
| AK086497 | 0,0275 | 1,56 | + | chr5: 150493277.. 150494435 | 1159 | Fantom  |
| AK045001 | 0,0221 | 1,56 | + | chr19: 32880860.. 32883043  | 2181 | Fantom  |
| AK082718 | 0,0443 | 1,56 | - | chr17: 35377111.. 35379229  | 2123 | RNAdb   |
| AK050645 | 0,0458 | 1,56 | + | chrX: 109470183.. 109473153 | 2966 | Fantom  |
| AK038712 | 0,0201 | 1,56 | - | chr13: 59681536.. 59686584  | 3155 | Fantom  |
| uc008uwp | 0,0232 | 1,55 | + | chr4: 128940973.. 128942245 | 450  | UCSC_kg |
| uc007zmf | 0,0125 | 1,55 | + | chr16: 56075521.. 56077249  | 1164 | UCSC_kg |
| AK038235 | 0,0276 | 1,55 | + | chr11: 54409656.. 54412815  | 3158 | NRED    |
| AK138787 | 0,0341 | 1,54 | + | chr1: 133998939.. 134002615 | 3677 | Fantom  |
| uc007qav | 0,0172 | 1,53 | - | chr13: 34078356.. 34094639  | 972  | UCSC_kg |
| AK033863 | 0,0293 | 1,53 | - | chr6: 50749070.. 50753030   | 1954 | NRED    |
| AK037398 | 0,0234 | 1,52 | + | chr15: 57544091.. 57546199  | 2108 | Fantom  |
| uc.413-  | 0,0434 | 1,52 | - | chr11: 98019327..98019599   | 272  | UCR     |
| AK034390 | 0,0174 | 1,52 | + | chr16: 91672926.. 91675859  | 2933 | Fantom  |
| AK139977 | 0,0415 | 1,52 | + | chr8: 40258492.. 40259546   | 1054 | Fantom  |
| AK020748 | 0,0409 | 1,52 | + | chr18: 21185917.. 21186724  | 809  | Fantom  |
| AK012801 | 0,0090 | 1,52 | + | chr12: 34123698.. 34125319  | 1623 | Fantom  |
| AK139207 | 0,0338 | 1,51 | - | chr4: 108295533.. 108297821 | 2289 | Fantom  |
| uc009ucq | 0,0058 | 1,51 | + | chrX: 106029995.. 106082235 | 759  | UCSC_kg |
| AK164121 | 0,0424 | 1,51 | + | chr11: 80211972.. 80215395  | 3425 | Fantom  |
| AK040275 | 0,0071 | 1,51 | + | chr4: 42885873.. 42888857   | 2988 | Fantom  |
| AK020941 | 0,0396 | 1,51 | - | chr6: 25687798.. 25688825   | 1032 | Fantom  |
| AK050725 | 0,0099 | 1,51 | + | chr9: 96188775.. 96191926   | 3152 | NRED    |
| uc007ywk | 0,0400 | 1,51 | - | chr16: 30021927.. 30039565  | 1209 | UCSC_kg |
| AK081120 | 0,0419 | 1,50 | + | chr8: 117325750.. 117328956 | 3206 | Fantom  |
| uc009kdq | 0,0141 | 1,50 | - | chr7: 141376578.. 141423814 | 1463 | UCSC_kg |
| AK009271 | 0,0164 | 1,50 | - | chrX: 34354765.. 34357195   | 1039 | NRED    |
| AK138176 | 0,0199 | 1,50 | + | chr10: 42932526.. 42934637  | 2112 | Fantom  |

### Downregulated lncRNAs

| <i>l</i> ccession numbe | <i>p</i> -value | <i>FC</i> Abs | <i>strand</i> | <i>Map</i>                  | <i>length</i> | <i>source</i> |
|-------------------------|-----------------|---------------|---------------|-----------------------------|---------------|---------------|
| AK028061                | 0,006           | 7,30          | -             | chrX: 71275119.. 71278389   | 3270          | Fantom        |
| uc008uub                | 0,036           | 5,34          | +             | chr4: 126712887.. 126726642 | 2007          | UCSC_kg       |
| AK080837                | 0,003           | 4,54          | -             | chrX: 72644392.. 72645693   | 1301          | Fantom        |
| AK049444                | 0,018           | 4,49          | +             | chr1: 193091056.. 193112593 | 1452          | Fantom        |
| AK054018                | 0,002           | 3,92          | +             | chr3: 144610524.. 144617842 | 1624          | Fantom        |
| AK043558                | 0,027           | 3,79          | -             | chr18: 33347837.. 33350288  | 2452          | NRED          |
| AK158844                | 0,036           | 3,57          | +             | chr2: 97307589.. 97308837   | 1247          | Fantom        |
| AK167184                | 0,014           | 3,37          | +             | chrM: 3913.. 5171           | 1259          | Fantom        |
| uc007ntl                | 0,038           | 3,27          | +             | chr12: 71255128.. 71284334  | 3028          | UCSC_kg       |
| uc007chz                | 0,011           | 3,26          | -             | chr1: 117565564.. 117581196 | 1342          | UCSC_kg       |

|          |       |      |   |                              |      |                  |
|----------|-------|------|---|------------------------------|------|------------------|
| AK037691 | 0,032 | 3,26 | + | chr15: 95769024.. 95774559   | 3488 | Fantom           |
| AK140115 | 0,046 | 3,23 | + | chr10: 115503297.. 115505514 | 2218 | Fantom           |
| AK041727 | 0,032 | 3,23 | - | chr3: 115387820.. 115388380  | 560  | Fantom           |
| AK049486 | 0,043 | 3,20 | + | chr9: 72736851.. 72738292    | 1441 | Fantom           |
| AK052676 | 0,030 | 3,13 | - | chrX: 71326373.. 71329610    | 3237 | NRED             |
| uc.366+  | 0,038 | 3,13 | + | chr12: 52730337..52730539    | 202  | UCR              |
| AK156874 | 0,035 | 3,12 | + | chr2: 155651880.. 155654616  | 2735 | Fantom_stringent |
| AK039889 | 0,008 | 3,11 | - | chr4: 63642939.. 63643617    | 679  | Fantom           |
| AK139903 | 0,024 | 3,04 | + | chr2: 76311770.. 76313839    | 2073 | Fantom           |
| uc007tso | 0,027 | 2,98 | + | chr14: 54164980.. 54349746   | 217  | UCSC_kg          |
| AK134668 | 0,007 | 2,95 | - | chr11: 69609576.. 69611704   | 2131 | Fantom           |
| AK017761 | 0,021 | 2,90 | + | chr12: 13003987.. 13004839   | 852  | NRED             |
| AK052977 | 0,016 | 2,86 | - | chr3: 40966969.. 40976585    | 1370 | Fantom           |
| AK142702 | 0,015 | 2,86 | - | chr9: 79291843.. 79367109    | 3722 | Fantom           |
| AK142911 | 0,031 | 2,85 | + | chr10: 89843525.. 89845745   | 2223 | Fantom           |
| AK076294 | 0,045 | 2,81 | + | chr12: 77010204.. 77014874   | 3015 | NRED             |
| uc009ggv | 0,031 | 2,79 | - | chr7: 31650845.. 31665361    | 3707 | UCSC_kg          |
| uc007ymw | 0,013 | 2,79 | - | chr16: 18207914.. 18213626   | 3257 | UCSC_kg          |
| AK045496 | 0,024 | 2,78 | + | chr16: 25956560.. 25960428   | 2153 | Fantom           |
| uc007ytl | 0,012 | 2,77 | + | chr16: 23175352.. 23204449   | 1079 | UCSC_kg          |
| AK011562 | 0,012 | 2,76 | + | chr8: 3567994.. 3578597      | 964  | NRED             |
| AK088880 | 0,011 | 2,75 | + | chr1: 175603805.. 175610463  | 3770 | RNAdb            |
| AK170771 | 0,043 | 2,75 | + | chr16: 32247355.. 32251467   | 4111 | Fantom_stringent |
| AK037464 | 0,022 | 2,74 | + | chr17: 53752390.. 53754555   | 2163 | Fantom           |
| AK162877 | 0,015 | 2,74 | - | chr2: 37252410.. 37255108    | 2700 | Fantom           |
| AK034737 | 0,016 | 2,71 | + | chr2: 48975855.. 48978283    | 2425 | Fantom           |
| AK037590 | 0,021 | 2,69 | + | chr3: 130824083.. 130826516  | 2436 | Fantom           |
| AK032184 | 0,008 | 2,68 | + | chr1: 15474311.. 15475427    | 1117 | Fantom           |
| AK134706 | 0,019 | 2,67 | + | chr8: 93579162.. 93580456    | 1296 | Fantom           |
| AK047482 | 0,007 | 2,67 | - | chr7: 88637315.. 88638745    | 1434 | RNAdb            |
| AK045943 | 0,006 | 2,65 | + | chr2: 5947942.. 5950022      | 2083 | Fantom           |
| AK013581 | 0,049 | 2,65 | - | chr13: 6924528.. 6925097     | 569  | NRED             |
| AK038169 | 0,005 | 2,63 | + | chrX: 98481385.. 98484124    | 2740 | Fantom           |
| AK148386 | 0,005 | 2,62 | - | chr6: 52586808.. 52590309    | 3503 | Fantom           |
| AK007211 | 0,005 | 2,61 | - | chr8: 90023947.. 90025130    | 986  | NRED             |
| AK034677 | 0,026 | 2,61 | + | chr6: 71444258.. 71475012    | 1279 | Fantom           |
| AK047876 | 0,004 | 2,59 | - | chr13: 17114770.. 17117821   | 3051 | Fantom           |
| AK006606 | 0,004 | 2,58 | + | chr6: 41634429.. 41635710    | 736  | Fantom           |
| uc007gwf | 0,036 | 2,58 | - | chr10: 94847995.. 94875744   | 4243 | UCSC_kg          |
| AK140935 | 0,025 | 2,56 | + | chr13: 22036998.. 22037896   | 898  | Fantom           |
| AK139905 | 0,004 | 2,56 | + | chr11: 3521324.. 3539552     | 3272 | Fantom           |
| AK040386 | 0,003 | 2,55 | - | chr4: 55352865.. 55355615    | 2752 | Fantom           |
| AK139166 | 0,012 | 2,55 | + | chr1: 54747339.. 54824367    | 2118 | Fantom           |
| AK085067 | 0,002 | 2,54 | + | chr15: 92190820.. 92194694   | 3873 | Fantom           |
| AK015033 | 0,016 | 2,53 | + | chr18: 35113701.. 35115584   | 1883 | Fantom           |
| AK033204 | 0,036 | 2,51 | + | chr15: 4492654.. 4495661     | 3008 | Fantom           |
| AK076446 | 0,003 | 2,51 | + | chr5: 109058862.. 109061355  | 2497 | Fantom           |
| AK090167 | 0,003 | 2,50 | + | chr14: 57396327.. 57399264   | 2939 | Fantom           |
| uc009bre | 0,003 | 2,50 | + | chr6: 42320669.. 42330554    | 842  | UCSC_kg          |
| AK085407 | 0,001 | 2,50 | - | chr3: 151408656.. 151412911  | 4084 | Fantom           |

|          |       |      |   |                              |      |                  |
|----------|-------|------|---|------------------------------|------|------------------|
| AK086239 | 0,048 | 2,48 | - | chr4: 123311172.. 123314088  | 2917 | RNAdb            |
| AK042451 | 0,029 | 2,46 | + | chr7: 81702872.. 81704757    | 1522 | Fantom           |
| AK134130 | 0,024 | 2,45 | + | chr3: 7612704.. 7615015      | 2304 | Fantom           |
| AK021161 | 0,007 | 2,45 | + | chr4: 118241644.. 118242960  | 1315 | Fantom_stringent |
| AK051919 | 0,004 | 2,44 | - | chr11: 70480668.. 70482792   | 2125 | Fantom           |
| AK037326 | 0,004 | 2,42 | + | chr1: 182306574.. 182309645  | 3071 | Fantom           |
| uc007pqb | 0,004 | 2,42 | + | chr13: 21409126.. 21411493   | 475  | UCSC_kg          |
| AK036797 | 0,011 | 2,42 | + | chr12: 74757248.. 74759176   | 1928 | Fantom           |
| AK053967 | 0,005 | 2,42 | - | chr1: 92733851.. 92735710    | 1859 | Fantom           |
| AK034561 | 0,040 | 2,40 | + | chr18: 9215037.. 9218135     | 3102 | NRED             |
| AK136086 | 0,006 | 2,40 | + | chr12: 37563971.. 37566784   | 2813 | Fantom           |
| AK030791 | 0,023 | 2,39 | - | chr11: 43184518.. 43187899   | 3384 | Fantom_stringent |
| AK084544 | 0,020 | 2,39 | + | chr11: 104443352.. 104447661 | 3273 | RNAdb            |
| AK020844 | 0,009 | 2,35 | - | chr10: 68901752.. 68902488   | 737  | NRED             |
| AK140836 | 0,024 | 2,34 | + | chr10: 69159707.. 69164854   | 5149 | Fantom           |
| AK037716 | 0,035 | 2,34 | - | chr9: 71806649.. 71810883    | 4235 | Fantom           |
| AK085112 | 0,008 | 2,34 | + | chr6: 14942562.. 14945091    | 2535 | Fantom           |
| AK165122 | 0,009 | 2,34 | - | chr3: 88201286.. 88203632    | 2346 | Fantom           |
| AK136879 | 0,039 | 2,33 | - | chr2: 91038482.. 91041184    | 2701 | Fantom           |
| AK048974 | 0,045 | 2,32 | - | chr4: 136535648.. 136543144  | 3846 | RNAdb            |
| AK084688 | 0,034 | 2,32 | + | chr16: 96367006.. 96368371   | 1289 | RNAdb            |
| uc007imm | 0,016 | 2,32 | - | chr11: 43228145.. 43230315   | 808  | UCSC_kg          |
| AK035174 | 0,009 | 2,32 | - | chr9: 15124272.. 15126855    | 2585 | Fantom           |
| AK157524 | 0,012 | 2,31 | + | chr6: 134188993.. 134193283  | 4275 | Fantom           |
| AK045145 | 0,029 | 2,31 | - | chr15: 43693168.. 43701582   | 2626 | RNAdb            |
| uc.215-  | 0,005 | 2,30 | + | chr13: 15635633..15635895    | 262  | UCR              |
| AK134174 | 0,014 | 2,29 | - | chr19: 5373614.. 5377678     | 4072 | Fantom           |
| uc.193+  | 0,045 | 2,29 | + | chr9: 88348175..88348494     | 319  | UCR              |
| AK051337 | 0,049 | 2,29 | - | chr13: 62731533.. 62737449   | 3060 | Fantom           |
| AK049142 | 0,031 | 2,28 | + | chr13: 94128355.. 94130412   | 2057 | Fantom           |
| AK004432 | 0,042 | 2,27 | - | chr6: 48386635.. 48387151    | 516  | Fantom           |
| AK030377 | 0,028 | 2,26 | - | chr1: 196781952.. 196803153  | 2493 | NRED             |
| AK034062 | 0,018 | 2,26 | + | chr17: 58081320.. 58083716   | 2400 | Fantom           |
| AK084015 | 0,013 | 2,26 | + | chr12: 45474183.. 45475249   | 1063 | Fantom           |
| AK139823 | 0,020 | 2,25 | - | chr12: 26776826.. 26895370   | 881  | Fantom           |
| AY039009 | 0,011 | 2,25 | - | chr2: 44929031.. 44935120    | 6142 | NRED             |
| uc009atr | 0,021 | 2,25 | + | chr5: 150883196.. 150883911  | 458  | UCSC_kg          |
| AK050083 | 0,016 | 2,24 | - | chr6: 51866757.. 51869636    | 2881 | NRED             |
| AK157099 | 0,049 | 2,24 | + | chr16: 8234733.. 8237678     | 2947 | Fantom           |
| AK139657 | 0,034 | 2,22 | - | chr11: 108061799.. 108065798 | 2720 | Fantom           |
| uc.184+  | 0,004 | 2,22 | + | chr11: 31833617..31833847    | 230  | UCR              |
| AK082070 | 0,026 | 2,21 | + | chr18: 39137447.. 39141269   | 3842 | Fantom           |
| uc008pol | 0,027 | 2,21 | + | chr3: 81605946.. 81609083    | 1194 | UCSC_kg          |
| uc009jht | 0,027 | 2,21 | - | chr7: 120844403.. 120851954  | 2329 | UCSC_kg          |
| AK018981 | 0,038 | 2,20 | + | chr10: 56224306.. 56225093   | 788  | Fantom_stringent |
| AK015046 | 0,005 | 2,20 | - | chr4: 116847012.. 116855197  | 1011 | RNAdb            |
| uc007msb | 0,042 | 2,20 | - | chr11: 120046713.. 120051170 | 2957 | UCSC_kg          |
| AK047771 | 0,031 | 2,19 | - | chr14: 70834526.. 70836402   | 1876 | Fantom           |
| AK149513 | 0,035 | 2,18 | - | chr16: 52427714.. 52431955   | 4244 | Fantom           |
| AK043696 | 0,009 | 2,15 | + | chr18: 15510442.. 15520815   | 3402 | Fantom           |

|          |       |      |   |                              |      |                  |
|----------|-------|------|---|------------------------------|------|------------------|
| AK087189 | 0,004 | 2,15 | + | chr9: 70578840.. 70581714    | 2876 | Fantom           |
| AK156368 | 0,010 | 2,14 | + | chr6: 96587128.. 96590181    | 3052 | Fantom           |
| AK160721 | 0,032 | 2,14 | + | chr5: 112010580.. 112016173  | 1839 | Fantom           |
| AK036005 | 0,011 | 2,14 | + | chr2: 122214243.. 122216075  | 1833 | Fantom           |
| uc007xdh | 0,010 | 2,14 | + | chr15: 85411571.. 85424138   | 2976 | UCSC_kg          |
| uc008grn | 0,040 | 2,13 | - | chr19: 11122102.. 11125010   | 728  | UCSC_kg          |
| AK046948 | 0,037 | 2,13 | - | chr9: 91223226.. 91224882    | 1657 | Fantom           |
| AK015119 | 0,037 | 2,13 | + | chr6: 30846898.. 30893470    | 1018 | NRED             |
| AK035258 | 0,018 | 2,13 | - | chr3: 122809520.. 122812448  | 2928 | NRED             |
| AK138322 | 0,039 | 2,12 | - | chr17: 31104627.. 31106950   | 1216 | Fantom           |
| uc007wsw | 0,043 | 2,11 | - | chr15: 78989564.. 78994936   | 494  | UCSC_kg          |
| AK051938 | 0,017 | 2,11 | + | chr1: 32229573.. 32303717    | 3254 | RNAdb            |
| AK087708 | 0,014 | 2,10 | - | chr3: 29971422.. 29973199    | 1776 | NRED             |
| AK156811 | 0,002 | 2,10 | - | chr13: 12139608.. 12144322   | 5126 | RNAdb            |
| AK003290 | 0,030 | 2,10 | + | chr3: 137742666.. 137744461  | 1795 | NRED             |
| AK157092 | 0,045 | 2,09 | + | chr14: 19417582.. 19420667   | 3085 | Fantom           |
| uc.297+  | 0,031 | 2,07 | + | chr19: 44749215..44749579    | 364  | UCR              |
| AK044083 | 0,022 | 2,07 | - | chrX: 56802611.. 56805692    | 3079 | NRED             |
| uc007pbb | 0,011 | 2,07 | + | chr12: 110872412.. 110884550 | 1066 | UCSC_kg          |
| AK158400 | 0,030 | 2,07 | + | chr13: 23673883.. 23674604   | 724  | Fantom           |
| AK142754 | 0,038 | 2,06 | + | chr11: 58819629.. 58822230   | 2605 | Fantom           |
| AK046651 | 0,023 | 2,06 | + | chr14: 21365447.. 21366659   | 1212 | Fantom           |
| uc007eda | 0,039 | 2,06 | - | chr1: 193714109.. 193725600  | 813  | UCSC_kg          |
| uc007oyi | 0,032 | 2,06 | - | chr12: 106633069.. 106641970 | 1571 | UCSC_kg          |
| AK080098 | 0,050 | 2,05 | - | chr7: 113072848.. 113074425  | 1579 | Fantom           |
| uc007pgs | 0,049 | 2,05 | - | chr12: 114656769.. 114659220 | 473  | UCSC_kg          |
| AK007220 | 0,020 | 2,05 | - | chr8: 97318070.. 97326336    | 372  | Fantom_stringent |
| AK086869 | 0,030 | 2,05 | + | chr13: 78345929.. 78347602   | 1674 | NRED             |
| uc008lfv | 0,041 | 2,05 | - | chr2: 93131992.. 93174607    | 3702 | UCSC_kg          |
| uc007xrw | 0,046 | 2,04 | - | chr15: 100479575.. 100481150 | 538  | UCSC_kg          |
| AK087841 | 0,038 | 2,04 | - | chr9: 40102343.. 40104326    | 1989 | Fantom           |
| uc007pba | 0,006 | 2,04 | + | chr12: 110858536.. 110884550 | 1017 | UCSC_kg          |
| uc008ysg | 0,018 | 2,04 | + | chr5: 112010702.. 112016406  | 1949 | UCSC_kg          |
| AK087577 | 0,028 | 2,03 | - | chr4: 126017921.. 126022348  | 4427 | Fantom           |
| AK042872 | 0,036 | 2,03 | - | chr1: 175801678.. 175803902  | 2225 | Fantom           |
| AK038176 | 0,026 | 2,03 | - | chr17: 56597037.. 56601584   | 4549 | NRED             |
| AK133109 | 0,034 | 2,03 | + | chr19: 27730623.. 28009336   | 377  | Fantom           |
| AK035260 | 0,035 | 2,03 | - | chr3: 85355296.. 85358728    | 3431 | NRED             |
| uc008dfa | 0,043 | 2,03 | + | chr17: 59135673.. 59151561   | 939  | UCSC_kg          |
| AK142878 | 0,020 | 2,02 | + | chr17: 12965849.. 12968519   | 2671 | Fantom           |
| AK076249 | 0,036 | 2,02 | + | chr17: 21699187.. 21702103   | 2918 | Fantom           |
| uc008qdl | 0,050 | 2,02 | - | chr3: 91906499.. 91946666    | 687  | UCSC_kg          |
| AK043443 | 0,028 | 2,02 | - | chr1: 72473686.. 72475142    | 1456 | Fantom           |
| AK160558 | 0,037 | 2,01 | - | chr7: 38754433.. 38804511    | 748  | RNAdb            |
| AK136008 | 0,048 | 2,01 | - | chr11: 62146501.. 62147533   | 1033 | Fantom           |
| AK164281 | 0,016 | 2,00 | - | chr18: 34038591.. 34051293   | 487  | Fantom           |
| uc007lwc | 0,045 | 2,00 | + | chr11: 104034224.. 104036832 | 1332 | UCSC_kg          |
| AK014120 | 0,049 | 1,99 | + | chr3: 40650877.. 40671638    | 462  | RNAdb            |
| AK081465 | 0,037 | 1,99 | - | chr13: 74506773.. 74508268   | 1496 | Fantom           |
| AK079480 | 0,024 | 1,99 | - | chr6: 35066288.. 35070664    | 4377 | Fantom           |



|           |       |      |   |                              |      |         |
|-----------|-------|------|---|------------------------------|------|---------|
| uc007ctg  | 0,021 | 1,99 | - | chr1: 137331166.. 137332960  | 1794 | UCSC_kg |
| AK142534  | 0,014 | 1,99 | - | chr5: 45071432.. 45074840    | 3424 | Fantom  |
| AK006297  | 0,011 | 1,99 | + | chr13: 3497296.. 3500441     | 480  | NRED    |
| AK136848  | 0,046 | 1,99 | + | chr14: 27488498.. 27492137   | 3642 | NRED    |
| AK030498  | 0,035 | 1,98 | - | chr11: 22004284.. 22006022   | 1739 | Fantom  |
| AK034796  | 0,002 | 1,97 | - | chr18: 5572821.. 5575053     | 2236 | NRED    |
| AK083769  | 0,032 | 1,97 | + | chr11: 50884078.. 50886288   | 2215 | Fantom  |
| AK081192  | 0,042 | 1,97 | + | chr17: 80787509.. 80790678   | 3168 | NRED    |
| AK047659  | 0,018 | 1,97 | + | chr6: 111071718.. 111074129  | 2415 | Fantom  |
| AK013335  | 0,049 | 1,97 | + | chrX: 12858145.. 12859678    | 1536 | Fantom  |
| uc008jph  | 0,023 | 1,97 | - | chr2: 44951780.. 44966253    | 1392 | UCSC_kg |
| AK087868  | 0,013 | 1,97 | + | chr18: 89938422.. 89939590   | 1169 | RNAdb   |
| AK037906  | 0,011 | 1,96 | + | chr11: 96423041.. 96426788   | 3747 | NRED    |
| AK078711  | 0,045 | 1,96 | + | chr7: 104937050.. 105003422  | 914  | RNAdb   |
| AK144466  | 0,001 | 1,96 | + | chr17: 90854060.. 90855913   | 1858 | Fantom  |
| NR_003548 | 0,016 | 1,96 | + | chr3: 92177836.. 92179151    | 651  | RefSeq  |
| AK032257  | 0,036 | 1,96 | - | chr10: 114169176.. 114173002 | 3824 | NRED    |
| uc009meg  | 0,010 | 1,95 | - | chr8: 74148315.. 74153072    | 4757 | UCSC_kg |
| AK138227  | 0,035 | 1,95 | + | chr9: 27160269.. 27161678    | 1410 | Fantom  |
| AK015391  | 0,005 | 1,95 | - | chr4: 119046089.. 119056351  | 724  | Fantom  |
| AK018000  | 0,021 | 1,95 | + | chr16: 23280233.. 23280758   | 526  | NRED    |
| AK034913  | 0,013 | 1,95 | - | chr10: 74328226.. 74329643   | 1417 | Fantom  |
| AK155669  | 0,047 | 1,94 | + | chr12: 75011550.. 75015488   | 3945 | Fantom  |
| AK047920  | 0,033 | 1,94 | + | chr13: 119508003.. 119511743 | 3739 | NRED    |
| uc.382+   | 0,045 | 1,94 | + | chr2: 114565320.. 114565520  | 200  | UCR     |
| AK032386  | 0,035 | 1,94 | + | chr18: 24120360.. 24123169   | 2808 | Fantom  |
| AK134505  | 0,046 | 1,94 | - | chr1: 63196815.. 63199416    | 2635 | Fantom  |
| AK039185  | 0,016 | 1,93 | + | chr4: 84751103.. 84753141    | 2037 | Fantom  |
| AK171755  | 0,045 | 1,93 | - | chr9: 58065004.. 58066714    | 1714 | Fantom  |
| AK161155  | 0,029 | 1,93 | - | chr6: 65069030.. 65072921    | 3897 | Fantom  |
| uc008qwo  | 0,007 | 1,93 | - | chr3: 106737299.. 106894720  | 1360 | UCSC_kg |
| AK011587  | 0,009 | 1,93 | + | chr15: 43001674.. 43002770   | 1098 | NRED    |
| AK075848  | 0,043 | 1,93 | + | chr11: 6256002.. 6256644     | 642  | Fantom  |
| AK149330  | 0,045 | 1,92 | + | chr2: 181607467.. 181610214  | 2746 | Fantom  |
| AK033311  | 0,003 | 1,92 | + | chr14: 20686201.. 20692677   | 1475 | NRED    |
| AK033977  | 0,031 | 1,92 | - | chr3: 88625931.. 88636469    | 3691 | NRED    |
| AK016141  | 0,033 | 1,92 | + | chr12: 3442505.. 3496409     | 1197 | RNAdb   |
| AK161802  | 0,010 | 1,92 | - | chrX: 75726068.. 75829235    | 3362 | RNAdb   |
| AK142257  | 0,042 | 1,92 | - | chr4: 148119487.. 148121143  | 1657 | Fantom  |
| AK141775  | 0,025 | 1,91 | - | chr15: 64055062.. 64059359   | 4298 | Fantom  |
| uc008yik  | 0,045 | 1,91 | - | chr5: 101339021.. 101342726  | 920  | UCSC_kg |
| AK043462  | 0,037 | 1,91 | + | chr5: 105830255.. 105835987  | 2256 | Fantom  |
| AK019526  | 0,045 | 1,90 | - | chr9: 58150530.. 58152933    | 2407 | NRED    |
| AK142854  | 0,015 | 1,90 | - | chr15: 72932056.. 72936023   | 3969 | Fantom  |
| AK142062  | 0,015 | 1,89 | - | chr2: 90358497.. 90362585    | 4200 | NRED    |
| uc007tcv  | 0,001 | 1,89 | + | chr14: 43767977.. 43774311   | 594  | UCSC_kg |
| AK086517  | 0,011 | 1,89 | + | chr10: 52567106.. 52568512   | 1427 | Fantom  |
| AK016285  | 0,005 | 1,88 | + | chr16: 78454955.. 78455574   | 620  | NRED    |
| AK088641  | 0,021 | 1,88 | - | chr16: 20400834.. 20403842   | 3006 | Fantom  |
| uc007ugb  | 0,009 | 1,88 | - | chr14: 62221867.. 62301165   | 1454 | UCSC_kg |

|          |       |      |   |                              |      |                  |
|----------|-------|------|---|------------------------------|------|------------------|
| BC037766 | 0,018 | 1,88 | - | chr11: 16835157.. 16851102   | 1557 | NRED             |
| AK163678 | 0,024 | 1,88 | + | chr7: 28423878.. 28425856    | 1979 | Fantom           |
| AK008706 | 0,045 | 1,88 | + | chr2: 80473894.. 80474622    | 726  | NRED             |
| AK031792 | 0,017 | 1,87 | + | chr15: 84041946.. 84046791   | 4848 | Fantom           |
| AK035010 | 0,004 | 1,87 | + | chr17: 86970234.. 86972594   | 2361 | Fantom           |
| AK017366 | 0,002 | 1,87 | + | chr14: 55065154.. 55066698   | 1544 | NRED             |
| AK079737 | 0,020 | 1,87 | - | chr1: 158220231.. 158220877  | 647  | Fantom           |
| uc007lvu | 0,007 | 1,87 | - | chr11: 103689353.. 103690929 | 1576 | UCSC_kg          |
| AK081580 | 0,026 | 1,87 | + | chr11: 103564975.. 103566973 | 1998 | NRED             |
| AK081034 | 0,024 | 1,87 | - | chr3: 158159161.. 158161076  | 1916 | Fantom           |
| AK032779 | 0,031 | 1,86 | - | chr9: 49496850.. 49499954    | 3102 | NRED             |
| AK013860 | 0,015 | 1,86 | - | chr17: 3514263.. 3515570     | 1310 | NRED             |
| uc008bcy | 0,042 | 1,86 | - | chr17: 26095313.. 26122651   | 4562 | UCSC_kg          |
| AK016409 | 0,044 | 1,86 | - | chr4: 19959992.. 19968711    | 630  | NRED             |
| AK047852 | 0,031 | 1,85 | - | chr13: 23710849.. 23712963   | 2115 | Fantom           |
| AK052952 | 0,033 | 1,85 | - | chr4: 141895759.. 141897447  | 1695 | NRED             |
| AK131182 | 0,019 | 1,85 | - | chr16: 44485157.. 44501881   | 6645 | NRED             |
| AK031377 | 0,043 | 1,84 | + | chr1: 14778725.. 14783046    | 4321 | NRED             |
| AK047671 | 0,036 | 1,84 | - | chr10: 3486517.. 3488026     | 1510 | Fantom           |
| uc009kbw | 0,038 | 1,84 | + | chr7: 139345853.. 139346984  | 766  | UCSC_kg          |
| uc007sdp | 0,010 | 1,84 | - | chr14: 7515365.. 7516746     | 717  | UCSC_kg          |
| AK134954 | 0,043 | 1,83 | + | chr11: 16163220.. 16184554   | 2883 | Fantom           |
| AK053682 | 0,037 | 1,83 | - | chr11: 22001775.. 22004556   | 2783 | Fantom           |
| AK013655 | 0,003 | 1,83 | - | chr2: 6966599.. 6967665      | 1069 | NRED             |
| AK042955 | 0,009 | 1,83 | + | chr6: 136123078.. 136125682  | 1216 | Fantom           |
| AK017219 | 0,018 | 1,83 | - | chr2: 6841734.. 6842757      | 1740 | Fantom           |
| AK141747 | 0,017 | 1,83 | + | chr6: 108757128.. 108760194  | 3066 | Fantom           |
| AK047135 | 0,023 | 1,83 | + | chr17: 37150002.. 37152716   | 2712 | Fantom           |
| uc007bai | 0,020 | 1,83 | + | chr1: 55283094.. 55292466    | 1943 | UCSC_kg          |
| AK032063 | 0,047 | 1,82 | + | chr12: 87600428.. 87603517   | 3090 | Fantom           |
| AK083536 | 0,028 | 1,82 | - | chr6: 84646527.. 84647542    | 1015 | Fantom           |
| AK131806 | 0,033 | 1,82 | - | chr13: 98479795.. 98481177   | 459  | Fantom           |
| AK018228 | 0,040 | 1,82 | - | chrX: 146832317.. 146875680  | 1398 | Fantom           |
| AK042230 | 0,025 | 1,81 | - | chr9: 59267471.. 59269464    | 1996 | Fantom           |
| AK016050 | 0,001 | 1,81 | - | chr2: 115159683.. 115160274  | 594  | NRED             |
| AK037041 | 0,003 | 1,81 | - | chr4: 140817676.. 140821932  | 1962 | NRED             |
| AK084540 | 0,048 | 1,81 | - | chr9: 30747820.. 30752359    | 4547 | Fantom           |
| uc009lgd | 0,006 | 1,80 | - | chr8: 26659144.. 26666555    | 935  | UCSC_kg          |
| AK163959 | 0,009 | 1,80 | - | chr13: 56275063.. 56277527   | 2448 | Fantom           |
| AK046545 | 0,035 | 1,80 | - | chr8: 37673778.. 37675870    | 2094 | NRED             |
| AK028444 | 0,020 | 1,80 | + | chr2: 92868112.. 92873569    | 2910 | Fantom           |
| AK086675 | 0,048 | 1,80 | - | chr16: 30510200.. 30513195   | 3000 | Fantom           |
| AK133583 | 0,045 | 1,79 | + | chr6: 28544355.. 28546066    | 1712 | Fantom           |
| AK037543 | 0,029 | 1,79 | - | chr5: 11136506.. 11138558    | 2051 | NRED             |
| AK004890 | 0,042 | 1,79 | + | chr11: 120392087.. 120400297 | 2503 | RNAdb            |
| AK028615 | 0,000 | 1,78 | - | chr14: 75165514.. 75167909   | 2396 | Fantom           |
| uc009nsi | 0,048 | 1,78 | + | chr8: 124530990.. 124549969  | 761  | UCSC_kg          |
| AK189035 | 0,025 | 1,78 | - | chr15: 89201840.. 89202151   | 313  | NRED             |
| AK138466 | 0,049 | 1,78 | + | chr10: 127832280.. 127833025 | 745  | Fantom_stringent |
| uc009bpn | 0,008 | 1,78 | + | chr6: 41485554.. 41489880    | 788  | UCSC_kg          |

|          |       |      |   |                              |      |                  |
|----------|-------|------|---|------------------------------|------|------------------|
| AK018173 | 0,013 | 1,78 | + | chr4: 128586797.. 128588570  | 1773 | Fantom           |
| AK078008 | 0,007 | 1,78 | - | chr14: 68291234.. 68293163   | 1929 | Fantom           |
| AK028441 | 0,037 | 1,77 | - | chr14: 31952204.. 31956911   | 3454 | RNAdb            |
| AK078217 | 0,025 | 1,77 | + | chr12: 104418748.. 104419485 | 737  | Fantom           |
| AK018122 | 0,025 | 1,76 | - | chr1: 52514142.. 52518973    | 2052 | Fantom           |
| AK079367 | 0,043 | 1,76 | + | chr11: 45959363.. 45960839   | 1477 | Fantom           |
| AK139527 | 0,013 | 1,76 | - | chr11: 94616452.. 94622496   | 2693 | Fantom           |
| AK148570 | 0,035 | 1,76 | - | chr1: 84251984.. 84254884    | 2900 | Fantom           |
| AK004523 | 0,033 | 1,76 | + | chr8: 97897010.. 97898193    | 1183 | Fantom           |
| AK078621 | 0,047 | 1,76 | - | chr1: 63096916.. 63099028    | 2119 | NRED             |
| AK086893 | 0,017 | 1,75 | + | chr7: 46834451.. 46835959    | 1508 | Fantom           |
| AK015330 | 0,027 | 1,75 | - | chr5: 11485334.. 11501452    | 969  | Fantom_stringent |
| AK034287 | 0,000 | 1,75 | + | chr12: 62957254.. 62959329   | 2075 | Fantom           |
| AK031656 | 0,000 | 1,75 | + | chr16: 85900993.. 85904237   | 3247 | Fantom_stringent |
| uc009nxq | 0,044 | 1,75 | + | chr8: 127316991.. 127358604  | 5696 | UCSC_kg          |
| AK158957 | 0,017 | 1,75 | - | chr11: 5777878.. 5778205     | 328  | Fantom           |
| AK139049 | 0,035 | 1,74 | + | chr10: 101978936.. 101980156 | 1221 | Fantom           |
| AK144508 | 0,027 | 1,74 | + | chr6: 91361506.. 91362707    | 1201 | Fantom           |
| AK031245 | 0,019 | 1,74 | - | chr5: 96504594.. 96515952    | 3043 | RNAdb            |
| AK016112 | 0,015 | 1,74 | + | chr6: 85954378.. 85959338    | 1637 | NRED             |
| AK086253 | 0,032 | 1,74 | + | chr4: 141096826.. 141099520  | 2694 | NRED             |
| AK137533 | 0,046 | 1,74 | - | chr16: 94439627.. 94444619   | 4994 | RNAdb            |
| AK008893 | 0,018 | 1,74 | - | chr19: 57190511.. 57193514   | 718  | Fantom           |
| AK034893 | 0,041 | 1,74 | - | chr2: 158423912.. 158426252  | 2342 | Fantom           |
| AK160775 | 0,023 | 1,73 | - | chr6: 97345782.. 97346698    | 769  | Fantom           |
| AK081095 | 0,050 | 1,73 | + | chr11: 43375371.. 43377926   | 2556 | Fantom           |
| BC003765 | 0,010 | 1,73 | - | chr2: 65961899.. 65962707    | 828  | NRED             |
| AK132542 | 0,014 | 1,73 | + | chr1: 20669103.. 20674374    | 5276 | NRED             |
| AK043246 | 0,049 | 1,73 | - | chr8: 13286218.. 13287466    | 1249 | NRED             |
| AK039489 | 0,016 | 1,73 | - | chr13: 44288957.. 44311856   | 1938 | Fantom_stringent |
| uc007vqk | 0,032 | 1,72 | + | chr15: 44619329.. 44637373   | 839  | UCSC_kg          |
| AK047890 | 0,017 | 1,72 | + | chr19: 16316791.. 16318288   | 1497 | Fantom           |
| AK043511 | 0,030 | 1,72 | + | chr8: 82302728.. 82303531    | 802  | Fantom           |
| AK041649 | 0,024 | 1,72 | + | chr1: 158337121.. 158339155  | 684  | Fantom           |
| uc007dir | 0,009 | 1,72 | + | chr1: 166793263.. 166801569  | 1576 | UCSC_kg          |
| AK132637 | 0,043 | 1,72 | + | chr3: 90330793.. 90332748    | 1686 | Fantom           |
| AK045488 | 0,045 | 1,72 | - | chr7: 18981864.. 18986214    | 4351 | RNAdb            |
| uc007jgv | 0,040 | 1,72 | - | chr11: 60734442.. 60745369   | 1267 | UCSC_kg          |
| AK039212 | 0,013 | 1,72 | + | chr1: 66735509.. 66738911    | 3402 | NRED             |
| AK033124 | 0,036 | 1,72 | - | chr9: 86577978.. 86579137    | 1895 | Fantom           |
| AK080973 | 0,021 | 1,72 | - | chr4: 76997193.. 77857865    | 2125 | NRED             |
| uc008sru | 0,009 | 1,71 | - | chr4: 44176976.. 44180816    | 3840 | UCSC_kg          |
| AK156713 | 0,042 | 1,71 | - | chr7: 129022876.. 129026031  | 3160 | Fantom           |
| AK017462 | 0,009 | 1,71 | - | chr19: 17400632.. 17401675   | 1043 | Fantom           |
| AK014907 | 0,039 | 1,71 | + | chr16: 57332063.. 57335545   | 2042 | NRED             |
| LIT1863  | 0,017 | 1,70 | + | chr7: 150441265.. 150441608  | 342  | RNAdb            |
| AK086446 | 0,024 | 1,70 | + | chr9: 8544144.. 8545663      | 1519 | RNAdb            |
| AK148953 | 0,027 | 1,70 | + | chr12: 54375249.. 54376581   | 1333 | Fantom           |
| AK133617 | 0,014 | 1,70 | + | chr6: 85616676.. 85619717    | 3040 | Fantom           |
| AK133427 | 0,025 | 1,70 | + | chr4: 123536921.. 123540408  | 2184 | Fantom           |

|          |       |      |   |                              |      |                  |
|----------|-------|------|---|------------------------------|------|------------------|
| uc008puw | 0,007 | 1,70 | - | chr3: 88172541.. 88176665    | 1043 | UCSC_kg          |
| AK135920 | 0,011 | 1,70 | - | chr12: 107333032.. 107337186 | 1170 | Fantom           |
| uc.436-  | 0,033 | 1,70 | + | chr18: 69506849..69507059    | 210  | UCR              |
| AK021043 | 0,017 | 1,70 | - | chr18: 42775289.. 42777578   | 1027 | NRED             |
| AK051336 | 0,016 | 1,69 | + | chr8: 4493452.. 4524051      | 2540 | RNAdb            |
| AK138116 | 0,016 | 1,69 | + | chr13: 84417669.. 84419019   | 1350 | Fantom           |
| uc009tqh | 0,046 | 1,69 | - | chrX: 72970803.. 73010038    | 3369 | UCSC_kg          |
| AK141079 | 0,027 | 1,69 | - | chr16: 28215462.. 28219947   | 4486 | Fantom           |
| AK030418 | 0,017 | 1,69 | - | chr17: 63195381.. 63198758   | 3376 | NRED             |
| FT328412 | 0,007 | 1,69 | + | chr1: 95195787.. 95197640    | 1853 | RNAdb            |
| uc007wzr | 0,042 | 1,69 | + | chr15: 82813299.. 82819564   | 2200 | UCSC_kg          |
| uc007uxv | 0,047 | 1,69 | + | chr14: 105989273.. 105993121 | 3388 | UCSC_kg          |
| AK046053 | 0,042 | 1,69 | + | chr16: 72027865.. 72029928   | 2065 | NRED             |
| AK054319 | 0,009 | 1,68 | - | chr8: 125790199.. 125791730  | 1533 | NRED             |
| uc009gxl | 0,010 | 1,68 | + | chr7: 53086264.. 53090615    | 1231 | UCSC_kg          |
| AK051865 | 0,026 | 1,68 | - | chr11: 5302882.. 5305019     | 2138 | Fantom           |
| AK164585 | 0,029 | 1,68 | - | chr17: 23310859.. 23330177   | 513  | Fantom_stringent |
| uc007hcv | 0,011 | 1,68 | + | chr10: 116615505.. 116618166 | 537  | UCSC_kg          |
| AK044827 | 0,039 | 1,68 | - | chr19: 30693860.. 30699981   | 979  | RNAdb            |
| AK158741 | 0,045 | 1,68 | + | chr12: 90383994.. 90398234   | 2634 | RNAdb            |
| AK085699 | 0,008 | 1,68 | - | chr3: 96237550.. 96256341    | 1640 | Fantom           |
| AK141393 | 0,041 | 1,68 | - | chr5: 108208243.. 108211521  | 3278 | Fantom           |
| AK081284 | 0,028 | 1,68 | - | chr2: 6924199.. 6928888      | 4693 | NRED             |
| AK031005 | 0,019 | 1,68 | + | chr4: 135797086.. 135801229  | 2155 | Fantom           |
| AK041530 | 0,005 | 1,68 | + | chr13: 93864787.. 93868923   | 2991 | NRED             |
| AK037848 | 0,044 | 1,68 | - | chr14: 73652688.. 73655796   | 3109 | Fantom           |
| AK135207 | 0,046 | 1,68 | - | chr1: 80517072.. 80518971    | 1903 | Fantom           |
| uc007bcr | 0,031 | 1,67 | + | chr1: 58770139.. 58779914    | 1106 | UCSC_kg          |
| AK162559 | 0,017 | 1,67 | + | chr3: 133907788.. 133909881  | 2094 | Fantom           |
| AK154331 | 0,041 | 1,67 | + | chr18: 4681080.. 4682866     | 1788 | Fantom_stringent |
| AK136792 | 0,042 | 1,66 | - | chr9: 50485959.. 50488935    | 2978 | Fantom           |
| AK044152 | 0,024 | 1,66 | + | chr11: 74637996.. 74639448   | 1453 | Fantom           |
| AK163918 | 0,023 | 1,66 | + | chr8: 107892456.. 107893781  | 1325 | Fantom           |
| uc009mq5 | 0,040 | 1,66 | + | chr8: 89996710.. 90049453    | 682  | UCSC_kg          |
| AK135978 | 0,042 | 1,66 | + | chr10: 6133420.. 6140115     | 2659 | Fantom           |
| AK013081 | 0,048 | 1,66 | + | chr7: 106468235.. 106468728  | 493  | Fantom           |
| uc007qar | 0,040 | 1,65 | + | chr13: 34027900.. 34052050   | 777  | UCSC_kg          |
| AK036322 | 0,019 | 1,65 | - | chr14: 123358522.. 123360990 | 2467 | Fantom           |
| AK040078 | 0,032 | 1,65 | + | chr2: 143745265.. 143746244  | 982  | Fantom           |
| AK166762 | 0,004 | 1,65 | - | chrX: 115258393.. 115259440  | 1048 | Fantom           |
| AK083081 | 0,020 | 1,65 | + | chr14: 58423801.. 58425473   | 1674 | Fantom           |
| AK037595 | 0,045 | 1,65 | + | chr11: 77160526.. 77163690   | 3164 | Fantom           |
| uc007mjk | 0,007 | 1,65 | - | chr11: 115849311.. 115855029 | 2078 | UCSC_kg          |
| uc009uiy | 0,002 | 1,65 | + | chrX: 133277514.. 133337900  | 3207 | UCSC_kg          |
| uc007uxu | 0,000 | 1,65 | + | chr14: 105988692.. 105994145 | 918  | UCSC_kg          |
| AK019562 | 0,038 | 1,65 | + | chr2: 153318525.. 153319577  | 333  | NRED             |
| AK018137 | 0,036 | 1,65 | + | chr9: 3904398.. 3905785      | 1388 | NRED             |
| AK048909 | 0,048 | 1,64 | + | chr9: 45669010.. 45672482    | 3472 | Fantom           |
| uc009hhe | 0,032 | 1,64 | - | chr7: 73404069.. 73427223    | 3494 | UCSC_kg          |
| AK135602 | 0,019 | 1,64 | - | chr2: 168455837.. 168457353  | 1517 | Fantom           |

|          |       |      |   |                              |      |                  |
|----------|-------|------|---|------------------------------|------|------------------|
| uc009nfh | 0,031 | 1,64 | + | chr8: 108660969.. 108662620  | 1174 | UCSC_kg          |
| AK080409 | 0,031 | 1,64 | - | chr18: 46889797.. 46893361   | 3565 | Fantom           |
| AK046808 | 0,012 | 1,64 | - | chr7: 88750326.. 88752246    | 1920 | Fantom           |
| AK040126 | 0,025 | 1,64 | + | chr15: 84534758.. 84536838   | 2079 | Fantom           |
| uc009rnr | 0,033 | 1,63 | + | chr9: 107885388.. 107886387  | 473  | UCSC_kg          |
| AK031095 | 0,010 | 1,63 | + | chr5: 46051305.. 46053960    | 2657 | NRED             |
| AK133561 | 0,045 | 1,63 | + | chr13: 110583691.. 110588730 | 5037 | NRED             |
| uc.95-   | 0,009 | 1,63 | - | chr2: 70312860..70313111     | 251  | UCR              |
| uc008pbb | 0,012 | 1,63 | - | chr3: 38348184.. 38349421    | 1237 | UCSC_kg          |
| uc007jye | 0,035 | 1,62 | - | chr11: 71967598.. 72020933   | 4703 | UCSC_kg          |
| AK142760 | 0,042 | 1,62 | - | chr9: 24948910.. 24950745    | 1836 | Fantom           |
| AK037431 | 0,027 | 1,62 | - | chr2: 152637734.. 152639216  | 1827 | Fantom           |
| uc009buo | 0,045 | 1,62 | + | chr6: 48454335.. 48484831    | 6192 | UCSC_kg          |
| AK144513 | 0,001 | 1,62 | + | chr8: 89996742.. 90049451    | 1455 | Fantom_stringent |
| AK139101 | 0,012 | 1,62 | - | chr3: 132715508.. 132717234  | 1728 | Fantom           |
| uc009gdc | 0,030 | 1,62 | - | chr7: 30844259.. 30857838    | 1906 | UCSC_kg          |
| AK133399 | 0,014 | 1,62 | - | chr8: 72285224.. 72315077    | 2681 | Fantom           |
| AK044807 | 0,044 | 1,62 | - | chr14: 19718880.. 19725793   | 2135 | RNAdb            |
| AK047535 | 0,036 | 1,62 | + | chr8: 91083931.. 91086848    | 2917 | Fantom           |
| uc007ibr | 0,034 | 1,62 | - | chr11: 16835161.. 16851121   | 1053 | UCSC_kg          |
| AK081400 | 0,012 | 1,62 | + | chr4: 36899998.. 36935057    | 1087 | Fantom           |
| AK035776 | 0,040 | 1,62 | + | chr19: 23868048.. 23870413   | 2407 | Fantom           |
| uc009ggc | 0,002 | 1,61 | + | chr7: 31514597.. 31530948    | 1276 | UCSC_kg          |
| AK083645 | 0,003 | 1,61 | - | chr7: 53938207.. 53940768    | 2562 | NRED             |
| AK045708 | 0,005 | 1,61 | + | chr8: 81749830.. 81757123    | 3077 | Fantom           |
| uc008fpr | 0,019 | 1,61 | + | chr18: 74874479.. 74931131   | 6126 | UCSC_kg          |
| AK047331 | 0,040 | 1,61 | - | chr10: 126719013.. 126720502 | 1070 | Fantom           |
| AK033795 | 0,006 | 1,61 | + | chr2: 70265902.. 70267252    | 1352 | Fantom           |
| AK046729 | 0,046 | 1,61 | + | chr15: 99529543.. 99531561   | 2019 | Fantom           |
| AK034008 | 0,043 | 1,61 | - | chr14: 93931176.. 93935906   | 4737 | NRED             |
| AK143039 | 0,047 | 1,61 | - | chrX: 75006316.. 75007556    | 1244 | Fantom           |
| uc007qbc | 0,013 | 1,61 | - | chr13: 34176023.. 34205141   | 1033 | UCSC_kg          |
| uc007kff | 0,048 | 1,61 | + | chr11: 75993172.. 76028329   | 4179 | UCSC_kg          |
| AK004278 | 0,030 | 1,61 | - | chr2: 30881726.. 30882132    | 407  | Fantom_stringent |
| AK049921 | 0,049 | 1,60 | + | chr1: 168231575.. 168233552  | 1983 | Fantom           |
| AK014189 | 0,040 | 1,60 | + | chr5: 64199036.. 64200769    | 1707 | RNAdb            |
| AK085661 | 0,010 | 1,60 | - | chr16: 15904977.. 15906824   | 1848 | Fantom           |
| AK051915 | 0,010 | 1,60 | + | chr16: 91692038.. 91694562   | 2524 | NRED             |
| AK003397 | 0,015 | 1,60 | - | chr7: 134341310.. 134342037  | 726  | Fantom_stringent |
| AK081489 | 0,041 | 1,60 | + | chr5: 112772114.. 112807432  | 3188 | RNAdb            |
| AK166199 | 0,015 | 1,60 | + | chr13: 16122089.. 16123440   | 1351 | NRED             |
| AK085372 | 0,043 | 1,60 | + | chr17: 21648955.. 21651460   | 2506 | Fantom           |
| AK038148 | 0,019 | 1,60 | + | chr11: 3219673.. 3222950     | 2035 | Fantom           |
| AK008472 | 0,037 | 1,60 | + | chr2: 122286562.. 122286867  | 305  | Fantom           |
| uc007cbv | 0,013 | 1,60 | - | chr1: 94804956.. 94807266    | 1867 | UCSC_kg          |
| AK048113 | 0,019 | 1,60 | + | chr17: 3399374.. 3402775     | 3343 | Fantom           |
| AK036993 | 0,022 | 1,60 | + | chr13: 119547532.. 119549175 | 1643 | Fantom           |
| AK003503 | 0,037 | 1,59 | - | chr7: 150874667.. 150875220  | 552  | Fantom           |
| AK040789 | 0,034 | 1,59 | - | chr6: 91628191.. 91629217    | 1027 | Fantom           |
| AK005773 | 0,037 | 1,59 | + | chr13: 100878058.. 100884186 | 502  | Fantom           |

|          |       |      |   |                              |      |                  |
|----------|-------|------|---|------------------------------|------|------------------|
| AK078155 | 0,010 | 1,59 | - | chr5: 138601407.. 138602900  | 1500 | Fantom           |
| AK034201 | 0,038 | 1,59 | - | chr18: 38745900.. 38749094   | 3193 | Fantom           |
| AK053249 | 0,006 | 1,59 | + | chr9: 53186506.. 53189255    | 2749 | Fantom           |
| AK076134 | 0,023 | 1,59 | - | chr15: 98369121.. 98371046   | 1926 | NRED             |
| uc009jib | 0,029 | 1,59 | - | chr7: 121498153.. 121558675  | 1045 | UCSC_kg          |
| AK170250 | 0,020 | 1,59 | - | chr15: 102359073.. 102360854 | 1779 | Fantom           |
| AK047090 | 0,044 | 1,59 | + | chr5: 135638124.. 135639740  | 1619 | Fantom_stringent |
| AK089241 | 0,014 | 1,59 | - | chr15: 64086727.. 64088631   | 1902 | Fantom           |
| AK080824 | 0,007 | 1,59 | + | chr1: 188822936.. 189064236  | 1195 | Fantom           |
| AK082498 | 0,038 | 1,59 | - | chr3: 8732869.. 8736200      | 3332 | NRED             |
| AK032679 | 0,047 | 1,59 | - | chr9: 29347088.. 29351235    | 4147 | Fantom           |
| AK016983 | 0,000 | 1,58 | - | chr19: 45801044.. 45805050   | 1040 | NRED             |
| AK078084 | 0,023 | 1,58 | - | chr1: 36478883.. 36481259    | 2377 | Fantom           |
| AK139256 | 0,026 | 1,58 | + | chr12: 75397654.. 75399468   | 1816 | Fantom           |
| AK034673 | 0,020 | 1,58 | + | chr10: 107711846.. 107713524 | 1680 | NRED             |
| AK155009 | 0,018 | 1,58 | - | chr10: 111433199.. 111434247 | 1049 | Fantom           |
| AK031487 | 0,001 | 1,58 | + | chr1: 61685448.. 61816433    | 2398 | Fantom           |
| AK082206 | 0,013 | 1,58 | + | chr4: 32509414.. 32512690    | 3277 | NRED             |
| AK143134 | 0,034 | 1,58 | + | chr4: 137581092.. 137582721  | 1630 | Fantom           |
| AK132921 | 0,014 | 1,58 | + | chr15: 31211843.. 31212891   | 1049 | Fantom           |
| AK039565 | 0,015 | 1,58 | + | chr1: 121225776.. 121235150  | 1370 | Fantom           |
| AK148176 | 0,013 | 1,58 | + | chr12: 35739772.. 35741631   | 1862 | Fantom           |
| AK141366 | 0,011 | 1,58 | + | chr2: 109161757.. 109164069  | 2313 | Fantom           |
| uc.1+    | 0,004 | 1,57 | - | chr4: 148414325.. 148414532  | 207  |                  |
| uc008qdw | 0,034 | 1,57 | + | chr3: 92189606.. 92191022    | 312  | UCSC_kg          |
| AK132472 | 0,021 | 1,57 | + | chr6: 121087475.. 121090524  | 3051 | Fantom           |
| AK081342 | 0,045 | 1,57 | - | chr14: 24782759.. 24786994   | 4235 | NRED             |
| AK157902 | 0,016 | 1,57 | - | chr7: 128122331.. 128125799  | 3467 | Fantom           |
| AK143269 | 0,016 | 1,57 | - | chr11: 50126868.. 50131947   | 5080 | Fantom           |
| AK161717 | 0,026 | 1,57 | - | chr1: 175787620.. 175798891  | 1352 | Fantom           |
| AK020521 | 0,001 | 1,57 | + | chr2: 70550040.. 70550427    | 388  | Fantom           |
| AK081031 | 0,046 | 1,57 | - | chr14: 25886389.. 25893928   | 2629 | NRED             |
| AK007071 | 0,008 | 1,57 | - | chr3: 152825691.. 152845779  | 675  | NRED             |
| AK134916 | 0,043 | 1,57 | + | chr1: 134097539.. 134102360  | 1585 | Fantom_stringent |
| AK038070 | 0,036 | 1,57 | + | chr4: 119808076.. 119810647  | 2573 | NRED             |
| AK014502 | 0,021 | 1,57 | - | chr8: 108292209.. 108295205  | 2996 | Fantom_stringent |
| AK012023 | 0,024 | 1,56 | - | chr4: 59786966.. 59796646    | 1585 | Fantom_stringent |
| AK043221 | 0,016 | 1,56 | + | chr1: 120955045.. 120956421  | 1379 | Fantom           |
| AK076119 | 0,046 | 1,56 | - | chr13: 114382392.. 114403849 | 3268 | Fantom           |
| AK021158 | 0,042 | 1,56 | - | chr12: 71353340.. 71354168   | 830  | Fantom           |
| AK131771 | 0,008 | 1,56 | + | chr8: 52263036.. 52265962    | 585  | Fantom           |
| AK164462 | 0,045 | 1,56 | - | chr9: 44572384.. 44575881    | 3495 | Fantom           |
| uc009usz | 0,045 | 1,56 | + | chrX: 156380652.. 156412099  | 2069 | UCSC_kg          |
| AK083729 | 0,023 | 1,56 | + | chr11: 66878238.. 66881657   | 3417 | Fantom           |
| AK084135 | 0,017 | 1,56 | - | chr18: 79082456.. 79086507   | 4053 | Fantom           |
| AK047501 | 0,023 | 1,56 | - | chr3: 129715981.. 129719708  | 3729 | Fantom           |
| AK012232 | 0,029 | 1,56 | - | chr10: 80364109.. 80365076   | 966  | Fantom           |
| AK149754 | 0,010 | 1,55 | + | chr2: 30808500.. 30814532    | 3013 | NRED             |
| uc009aux | 0,017 | 1,55 | - | chr6: 3283193.. 3296069      | 2991 | UCSC_kg          |
| uc009ind | 0,035 | 1,55 | + | chr7: 107685584.. 107686913  | 1329 | UCSC_kg          |

|          |       |      |   |                              |      |                  |
|----------|-------|------|---|------------------------------|------|------------------|
| AK050506 | 0,020 | 1,55 | + | chr1: 182263996.. 182268589  | 4595 | Fantom           |
| AK021097 | 0,019 | 1,55 | + | chr1: 169020095.. 169021136  | 1042 | Fantom           |
| AK088786 | 0,028 | 1,55 | + | chr7: 107685642.. 107688302  | 798  | RNAdb            |
| AK089029 | 0,028 | 1,55 | - | chr11: 115445570.. 115446515 | 949  | Fantom           |
| AK171756 | 0,013 | 1,54 | + | chr2: 30809782.. 30814531    | 4020 | NRED             |
| uc009rzn | 0,050 | 1,54 | + | chr9: 118059348.. 118079494  | 1181 | UCSC_kg          |
| AK156632 | 0,023 | 1,54 | + | chr15: 7149925.. 7151309     | 1390 | Fantom           |
| AK048002 | 0,043 | 1,54 | + | chr8: 17535440.. 17536635    | 1197 | NRED             |
| AK009593 | 0,043 | 1,54 | + | chr7: 3436095.. 3436379      | 284  | Fantom           |
| AK016175 | 0,043 | 1,54 | + | chr5: 136750865.. 136893764  | 1181 | Fantom           |
| AK016764 | 0,002 | 1,54 | + | chr9: 113617970.. 113619410  | 1441 | NRED             |
| AK085793 | 0,015 | 1,54 | + | chr1: 142163063.. 142166429  | 3367 | Fantom           |
| AK046176 | 0,004 | 1,54 | + | chr2: 156589381.. 156590097  | 716  | Fantom           |
| AK079167 | 0,029 | 1,54 | - | chr7: 16523186.. 16531099    | 1793 | Fantom           |
| AK086141 | 0,017 | 1,54 | + | chr2: 9346405.. 9347492      | 1085 | Fantom           |
| AK032394 | 0,006 | 1,53 | - | chr4: 49674483.. 49677859    | 3378 | Fantom           |
| uc009ssx | 0,011 | 1,53 | + | chrX: 19941733.. 19982779    | 1512 | UCSC_kg          |
| AK031518 | 0,025 | 1,53 | - | chr13: 63638770.. 63640986   | 2229 | RNAdb            |
| AK036147 | 0,010 | 1,53 | + | chr5: 37554087.. 37556965    | 2880 | Fantom           |
| AK076742 | 0,009 | 1,53 | + | chr4: 116660827.. 116661710  | 881  | Fantom           |
| AK004373 | 0,020 | 1,53 | + | chr4: 103038613.. 103039042  | 431  | RNAdb            |
| AK048252 | 0,010 | 1,53 | - | chr18: 71575619.. 71577970   | 2352 | NRED             |
| AK161748 | 0,032 | 1,53 | + | chr9: 102990548.. 102992778  | 2148 | Fantom_stringent |
| AK038308 | 0,009 | 1,53 | + | chr12: 107322579.. 107326864 | 4286 | NRED             |
| AK138995 | 0,015 | 1,53 | + | chrM: 1962.. 3841            | 1880 | Fantom           |
| AK162273 | 0,028 | 1,53 | - | chr9: 123698627.. 123701455  | 2829 | Fantom           |
| FT310581 | 0,012 | 1,52 | + | chr12: 114311008.. 114312588 | 1586 | RNAdb            |
| AK031519 | 0,020 | 1,52 | - | chr5: 149990078.. 149993545  | 3467 | Fantom           |
| AK084102 | 0,038 | 1,52 | - | chr16: 84965476.. 84967317   | 1841 | NRED             |
| AK046151 | 0,042 | 1,52 | + | chr12: 41946006.. 41947890   | 1885 | Fantom           |
| AK033240 | 0,001 | 1,52 | - | chr11: 21948661.. 21950813   | 2152 | Fantom           |
| AK141457 | 0,039 | 1,52 | - | chr6: 92626198.. 92627872    | 1674 | Fantom           |
| AK133068 | 0,005 | 1,52 | - | chr8: 38151989.. 38153363    | 1375 | Fantom           |
| AK035617 | 0,010 | 1,51 | + | chr2: 69738039.. 69740434    | 2703 | NRED             |
| AK138535 | 0,009 | 1,51 | + | chr1: 59933714.. 59935858    | 2145 | Fantom_stringent |
| AK156072 | 0,035 | 1,51 | - | chr3: 98251120.. 98252899    | 1779 | RNAdb            |
| AK028456 | 0,046 | 1,51 | + | chr9: 45931212.. 45933545    | 2334 | Fantom           |
| AK163498 | 0,031 | 1,51 | + | chr18: 65848304.. 65849088   | 784  | Fantom           |
| AK004377 | 0,032 | 1,51 | + | chr4: 151658063.. 151659445  | 1379 | Fantom_stringent |
| AK050892 | 0,017 | 1,51 | - | chr16: 85140044.. 85142316   | 2272 | NRED             |
| AK171536 | 0,046 | 1,51 | - | chr8: 40715677.. 40728005    | 2545 | Fantom_stringent |
| AK043456 | 0,005 | 1,51 | + | chr19: 53410010.. 53410783   | 773  | Fantom           |
| uc008spe | 0,023 | 1,51 | + | chr4: 43058905.. 43066125    | 592  | UCSC_kg          |
| AK013591 | 0,018 | 1,51 | - | chr18: 77694849.. 77695252   | 405  | Fantom_stringent |
| AK017981 | 0,027 | 1,51 | + | chr16: 50752452.. 50753589   | 1138 | NRED             |
| BC053715 | 0,007 | 1,51 | - | chr15: 37002744.. 37005085   | 2380 | NRED             |
| AK019330 | 0,042 | 1,51 | + | chr7: 52671670.. 52672024    | 356  | Fantom           |
| AK042462 | 0,018 | 1,51 | - | chr10: 128137193.. 128142055 | 2678 | RNAdb            |
| AK044925 | 0,044 | 1,51 | - | chr19: 32749947.. 32786787   | 2270 | RNAdb            |
| AK013552 | 0,012 | 1,51 | - | chr11: 18788263.. 18789843   | 1583 | NRED             |

|          |       |      |   |                              |      |        |
|----------|-------|------|---|------------------------------|------|--------|
| uc.332-  | 0,031 | 1,50 | + | chr9: 46468428..46468765     | 337  | UCR    |
| AK048348 | 0,008 | 1,50 | - | chr14: 103558685.. 103561936 | 3251 | NRED   |
| AK039420 | 0,034 | 1,50 | - | chr6: 18407072.. 18409511    | 2442 | Fantom |
| AK132786 | 0,044 | 1,50 | + | chr5: 97520241.. 97520882    | 641  | Fantom |
| AK038182 | 0,039 | 1,50 | + | chr16: 3856310.. 3858880     | 2572 | Fantom |
| AK008871 | 0,048 | 1,50 | - | chr12: 88728451.. 88729179   | 729  | RNAdb  |
| AK037839 | 0,048 | 1,50 | + | chr6: 86377812.. 86379886    | 2074 | Fantom |
| AK052062 | 0,038 | 1,50 | + | chr13: 109286011.. 109288364 | 2353 | Fantom |
| AK047606 | 0,025 | 1,50 | - | chr4: 86748516.. 86750138    | 1622 | NRED   |
| AK153979 | 0,032 | 1,50 | - | chr1: 95330084.. 96003206    | 2496 | Fantom |



## Supplementary table 2

### Upregulated lncRNAs

| <i>Accession</i> | <i>p-value</i> | <i>FC Abs</i> | <i>strand</i> | <i>Map</i>                   | <i>length</i> | <i>source</i> |
|------------------|----------------|---------------|---------------|------------------------------|---------------|---------------|
| AK148638         | 0,0279         | 7,13          | -             | chr5: 67485667.. 67486864    | 1199          | Fantom        |
| AK081227         | 0,0075         | 4,08          | +             | chr4: 33179640.. 33180890    | 1250          | Fantom        |
| AK084846         | 0,0133         | 3,67          | -             | chr3: 119441639.. 119445686  | 4052          | Fantom        |
| AK087060         | 0,0085         | 3,27          | +             | chr3: 62142923.. 62183108    | 2309          | RNAdb         |
| AK087668         | 0,0051         | 3,23          | +             | chr7: 75374178.. 75377336    | 3156          | Fantom        |
| AK162139         | 0,0155         | 2,91          | +             | chr12: 85934321.. 85936391   | 2071          | Fantom        |
| AK054306         | 0,0141         | 2,67          | -             | chr2: 163462259.. 163463893  | 1635          | Fantom        |
| AK032566         | 0,0344         | 2,18          | +             | chr12: 110887814.. 110890438 | 2626          | NRED          |

### Downregulated lncRNAs

| <i>Accession</i> | <i>p-value</i> | <i>FC Abs</i> | <i>strand</i> | <i>Map</i>                  | <i>length</i> | <i>source</i>    |
|------------------|----------------|---------------|---------------|-----------------------------|---------------|------------------|
| AK028061         | 0,0060         | 7,30          | -             | chrX: 71275119.. 71278389   | 3270          | Fantom           |
| AK080837         | 0,0029         | 4,54          | -             | chrX: 72644392.. 72645693   | 1301          | Fantom           |
| AK049444         | 0,0185         | 4,49          | +             | chr1: 193091056.. 193112593 | 1452          | Fantom           |
| AK158844         | 0,0364         | 3,57          | +             | chr2: 97307589.. 97308837   | 1247          | Fantom           |
| AK049486         | 0,0433         | 3,20          | +             | chr9: 72736851.. 72738292   | 1441          | Fantom           |
| AK156874         | 0,0355         | 3,12          | +             | chr2: 155651880.. 155654616 | 2735          | Fantom_stringent |
| AK039889         | 0,0084         | 3,11          | -             | chr4: 63642939.. 63643617   | 679           | Fantom           |
| AK142911         | 0,0308         | 2,85          | +             | chr10: 89843525.. 89845745  | 2223          | Fantom           |
